# Supplementary material for: Recovery of Polyphenols from Rosehip Seed Waste Using Natural Deep Eutectic Solvents and Ultrasonic Waves Simultaneously
Source: MDPI journal article supplement (doi:10.3390/foods12193655), 2023-10-03
Supplement: s1 [file s1]

# Recovery of Polyphenols from Rosehip Seed Waste Using Natural Deep Eutectic Solvents and Ultrasonic Waves Simultaneously

Aleksandra Gavarić <sup>1</sup>, Kristian Pastor <sup>1</sup>, Nataša Nastić <sup>1</sup>, Senka Vidović <sup>1</sup>, Nemanja Živanović <sup>2</sup>, Nataša Simin <sup>2</sup>, Ana Rita C. Duarte <sup>3</sup> and Jelena Vladić <sup>3,\*</sup>

<sup>1</sup> Faculty of Technology, University of Novi Sad, Bulevar cara Lazara 1, 21000 Novi Sad, Serbia; cvejina@uns.ac.rs (A.G.); kristian.pastor@uns.ac.rs (K.P.); natasa.nastic@uns.ac.rs (N.N.)

<sup>2</sup> Faculty of Sciences, University of Novi Sad, Trg Dositeja Obradovića 3, 21000 Novi Sad, Serbia; nemanja.zivanovic@dh.uns.ac.rs (N.Ž.)

<sup>3</sup> LAQV, REQUIMTE, Chemistry Department, NOVA School of Science and Technology, 2829-516 Caparica, Portugal

\* Correspondence: jelenavladic@fct.unl.pt

**Table S1.** NADES composition, abbreviation, molar ratio, polarity, and viscosity at 60°C

| NADES composition          | Abbreviation | Molar ratio | $E_{NR}$ (kcal·mol <sup>-1</sup> ) | $\eta$ (mPa·s) |
|----------------------------|--------------|-------------|------------------------------------|----------------|
| Betaine:lactic acid        | BE:LA        | 1:5         | 49.18±2.06                         | 34.80±2.51     |
| Betaine:glycerol           | BE:Gly       | 1:2         | 49.98±0.79                         | 227.33±4.66    |
| Lactic acid:proline        | LA:Pro       | 3:1         | 49.52±1.15                         | 76.17±1.72     |
| Lactic acid:glucose:water  | LA:Glu:W     | 5:1:3       | 47.86±2.31                         | 19.77±0.59     |
| Lactic acid:glycerol:water | LA:Gly:W     | 3:1:3       | 48.00±0.58                         | 6.77±0.06      |
| Menthol:lauric acid        | M:LA         | 4:1         | 53.18±0.58                         | 6.45±0.07      |
| Thymol:carvacrol           | T:C          | 1:1         | 49.58±1.06                         | 4.07±0.47      |
| Menthol:thymol             | M:T          | 1:1         | 50.99±1.12                         | 5.95±0.07      |

**Table S2.** Validation results – linear fit parameters ( $r^2$  - the coefficient of determination, and limit of linearity), limit of detection (LOD) and limit of quantification (LOQ)

| Compound                       | $r^2$ | Limit <sup>a</sup> (µg/mL) | LOD (µg/mL)       | LOQ (µg/mL)       |
|--------------------------------|-------|----------------------------|-------------------|-------------------|
| Quinic acid                    | 0.995 | 25 <sup>b</sup>            | 0.01              | 0.01              |
| Protocatechuic acid            | 0.996 | 3.1                        | 0.004             | 0.004             |
| <i>p</i> -Coumaric acid        | 0.995 | 3.1                        | 0.004             | 0.004             |
| Gallic acid                    | 0.990 | 1.6                        | 0.02              | 0.02              |
| Caffeic acid                   | 0.989 | 3.1                        | 0.006             | 0.006             |
| Chlorogenic acid               | 0.994 | 6.2                        | 0.007             | 0.007             |
| Ferulic acid                   | 0.992 | 6.2                        | 0.01              | 0.01              |
| Kaemferol-3- <i>O</i> -Glc     | 0.997 | 3.1                        | 0.004             | 0.004             |
| Luteolin-7- <i>O</i> -Glc      | 0.997 | 3.1                        | 0.005             | 0.005             |
| Quercetin-3- <i>O</i> -Glc+Gal | 0.995 | 3.1                        | 0.006             | 0.006             |
| Apigenin                       | n/a   | n/a                        | 0.01              | 0.01              |
| Baicalein                      | 0.993 | 6.2                        | 0.03              | 0.03              |
| Naringenin                     | 0.993 | 3.1                        | 0.007             | 0.007             |
| Catechin                       | 0.996 | 6.2                        | 0.05              | 0.05              |
| Epicatechin                    | 0.992 | 6.2                        | 0.06              | 0.06              |
| Epigallocatechin gallate       | 0.996 | 1.2                        | >0.1 <sup>c</sup> | >0.1 <sup>c</sup> |
| Quercetin                      | 0.980 | 1.6                        | >0.1 <sup>c</sup> | >0.1 <sup>c</sup> |
| Isorhamnetin                   | 0.990 | 1.6                        | 0.02              | 0.02              |
| Rutin                          | 0.996 | 6.2                        | 0.003             | 0.003             |
| Quercitrin                     | 0.994 | 1.2                        | 0.003             | 0.003             |
| Amentoflavone                  | n/a   | n/a                        | 0.005             | 0.005             |

n/a – not applicable since response was nonlinear in the entire evaluated range.

<sup>a</sup> Linearity limit - the highest calibration level used for linear regression.

<sup>b</sup> The highest concentration tested; the actual limit may be higher.

<sup>c</sup> Reliable quantification limit was above the highest concentration examined but was not further evaluated.
